# Supplementary material
Source: PubMed Central journal article supplement (PMC3813434)
Supplement: NIHMS512556-supplement-395_2013_375_MOESM2_ESM.pdf [file NIHMS512556-supplement-395_2013_375_MOESM2_ESM.pdf]

## Supplemental Material

### **Fibronectin contributes to pathological cardiac hypertrophy but not physiological growth**

Mathias H. Konstandin, MD<sup>1</sup>; Mirko Völkens, MD<sup>1</sup>; Brett Collins, BS<sup>1</sup>; Pearl Quijada, MS<sup>1</sup>; Mercedes Quintana<sup>1</sup>; Andrea De La Torre<sup>1</sup>; Lucy Ormachea<sup>1</sup>; Shabana Din, BS<sup>1</sup>; Natalie Gude, PhD<sup>1</sup>; Haruhiro Toko, MD<sup>1</sup>; Mark A. Sussman, PhD<sup>1</sup>

Short title: Konstandin, Fibronectin in cardiac hypertrophy

### Supplemental Figure 1

Schematic depicting the experimental design of the study for wheel running **(a)** or transaortic constriction **(b)**. **(c)** Heart rate assessment during echocardiography. **(d)** Efficiency of the global knockdown is depicted for the listed organs measured by RT-PCR. \*\*\*: p<0.001; \*\*: p<0.01; \*: p<0.05 compared to control.

### Supplemental Figure 2

**(a)** Immunoblot depicting Fn expression in control and KO mice after sham and TAC procedure. **(b)** Immunohistochemistry from control (left) and KO animals (right) after sham (top panel), or 3 weeks (middle panel) and 8 weeks after TAC procedure (bottom panel) depicting Fn expression (white), cardiomyocytes stained for sarcomeric actin (red) and nuclei (blue).

### Supplemental Figure 3

**(a)** Low magnification images for NRCMs plated on collagen (left) or Fn (right) after transfection with Ad-NFAT-GFP. Please see also Fig. 4c (scale 50µm). **(b)** Low magnification images of mice, which received Ad-NFAT-GFP via intra-myocardial injection 2 days before surgery. Hearts were harvested 2 days after TAC. Control mouse (left) and KO animal (right) after TAC are depicted (scale: 150µm). Please see also Fig. 4d. **(c)** Treatment with CyclosporinA (1µM) inhibits Fn induced activation of the pathological gene program.

### Supplemental Table 1

| Application | Antibody         | Dilution | Amplification | Company               |
|-------------|------------------|----------|---------------|-----------------------|
| IHC         | GFP              | 1:100    | no            | Rockland, 600-101-215 |
| IHC         | Desmin           | 1:200    | no            | Abcam, 15200          |
| IHC         | sarcomeric actin | 1:200    | no            | Sigma, A2172          |
| IHC         | Fn               | 1:100    | no            | Sigma, F3684          |
| immunoblot  | Fn               | 1:1000   | no            | Sigma, F3684          |

Antibodies used in the study. Application, dilution, amplification procedure as well as order information are provided.

### Supplementary Table 2

|                 | Forward                   | Reverse                   |
|-----------------|---------------------------|---------------------------|
| S18             | CGAGCCGCCTGGATACC         | CATGGCCTCAGTTCCGAAAA      |
| HPRT            | AAGGACCTCTCGAAGTGTGGATA   | CATTTAAAAGGAACTGTTGACAACG |
| bActin          | CATGAAGATCAAGATCATTGCTCCT | GCTGATCCACATCTGCTGGAA     |
| ANP             | TCTGATGGATTTCAAGAACCTGC   | CTGCTTCCTCAGTCTGCTCACTC   |
| BNP             | GCAATTCAAGATGCAGAAGCTG    | CTGCCTTGAGACCGAAGGACT     |
| Fibronectin     | ACCGAAGCCGGGAAGAGCAA      | GGTCCGTTCCCACTGCTGATTTATC |
| aSkeleton Actin | CGCCAGCCTCTGAAACTAGA      | AGCCGTTGTACACACAAGA       |
| bMHC            | GAGCCTTGGATTCTCAAACG      | GTGGCTCCGAGAAAGGAAG       |
| RCAN1.4         | TCCAGCTTGGGCTTGACTGAG     | ACTGGAAGGTGGTGTCTTGT      |
| c/EBPβ          | ACGACTTCCTCTCCGACCTCT     | AGGCTCACGTAACCGTAGTCG     |

|               |                        |                        |
|---------------|------------------------|------------------------|
| CITED4        | TGCCAGATGACAGTTGGGTC   | GGAATCCGAAGGCTGGTTCA   |
| $\alpha$ MHC  | GCAGCTGTGCATCAACTTCAC  | CACTCAATGCCCTCCTTCTTG  |
| Mef2c         | GATGAAGTGAAGCGTGGGAAGG | CACAGCTCAGTTCCCAAATCC  |
| Nkx2.5        | ACCTTTAGGAGAAGGGCGATG  | GAGGGTGGGTGTGAAATCTGA  |
| PGC1 $\alpha$ | AATCAGACCTGACACAACGC   | GCATTCCTCCTCAATTTACCAA |
| VEGF $\alpha$ | TGAGCTTCCTACAGCACAGCAG | TTACACGTCTGCGGATCTTGGA |
| Col 1a1       | ACGCCATCAAGGTCTACTGC   | ACTCGAACGGGAATCCATCG   |
| Col 3a1       | CCCTGGACCTCAGGGTATCA   | GGGTTTCCATCCCTTCCAGG   |

Mouse primer sequences applied in the study are depicted.

### Supplementary Table 3

|                         | <b>Forward</b>            | <b>Reverse</b>            |
|-------------------------|---------------------------|---------------------------|
| S18                     | CGAGCCGCCTGGATACC         | CATGGCCTCAGTTCCGAAAA      |
| HPRT                    | AAGGACCTCTCGAAGTGTGGATA   | CATTTAAAAGGAACTGTTGACAACG |
| bActin                  | CATGAAGATCAAGATCATTGCTCCT | GCTGATCCACATCTGCTGGAA     |
| ANP                     | TACAGTGCGGTGTCCAACACAGAT  | TGGGCTCCAATCCTGTCAATCCTA  |
| BNP                     | GTTCAAGCTGCTTTGGGCAGAAGA  | ACTGTGGCAAGTTTGTGCTGGAAG  |
| $\alpha$ Skeleton Actin | AGCAGCAGAACTAGACACCA      | CCACGATGGATGGGAACACA      |
| $\beta$ MHC             | GTTTGGCCACACCAAGGTGTTCTT  | AGTAGAGCTTCATCCACGGCCAAT  |
| RCAN1.4                 | CGGAGGCCAGAGTACACACC      | GGTCAGTGTGCCTGTTGAGCT     |
| c/EBP $\beta$           | GGGTTGTTGCTGTTGATGT       | GCTCGAAACGGAAAAGGTTT      |
| CITED4                  | ACGAGGGTGGTTTTGCAGTCT     | CAACTCAGCCAGACAGAGGAA     |
| $\alpha$ MHC            | GTGACAGTGGGAAAGGCAAAG     | AAAGTGAGGATGGGTGGTCCT     |
| Mef2c                   | AAGGAATGGATACGGCAAC       | TCCTAGATTCATAGGGGGAGGA    |
| Nkx2.5                  | CTCGGATTTACACCCACACT      | CTCCGGGTCTGATATGGAAT      |
| PGC1 $\alpha$           | TCCCACGACTCCTCCTCATAA     | TGCCTTGGGTACCAGAACAT      |
| VEGF $\alpha$           | TGAAAGACTCCGGTGTGGTCT     | GTTTCTGGAAGTGAGCCAACG     |

Rat primer sequences applied in the study are depicted.
