# Supplementary material
Source: PubMed Central journal article supplement (PMC3813434)

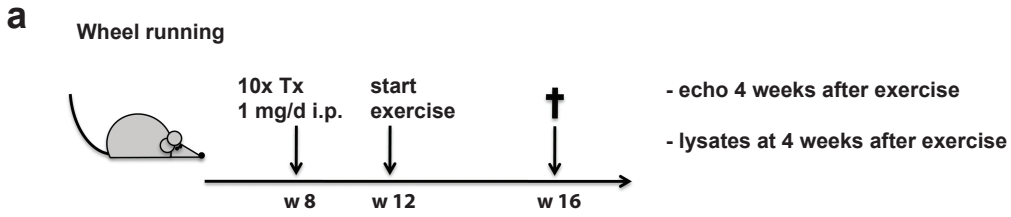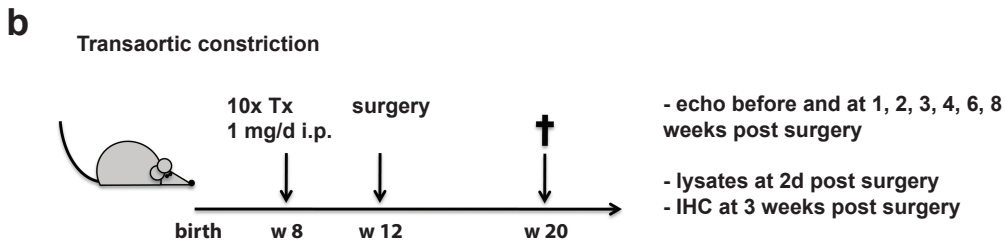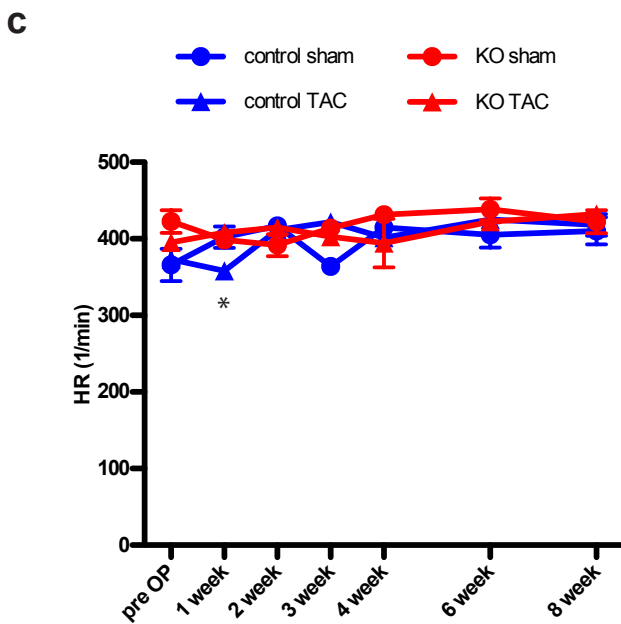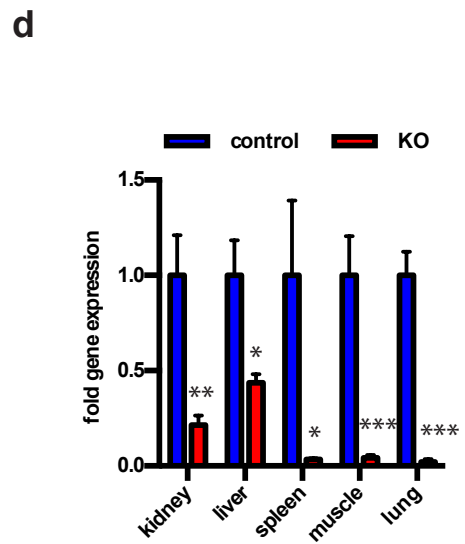

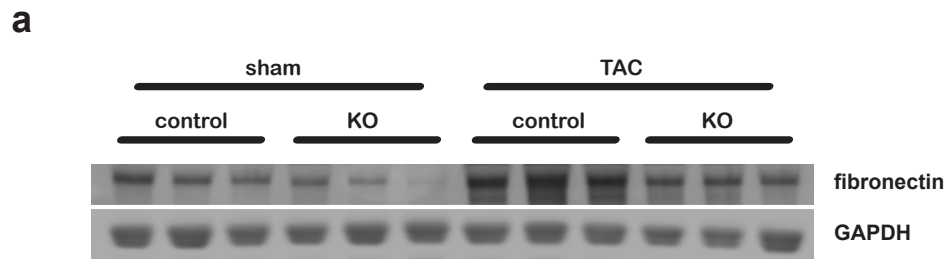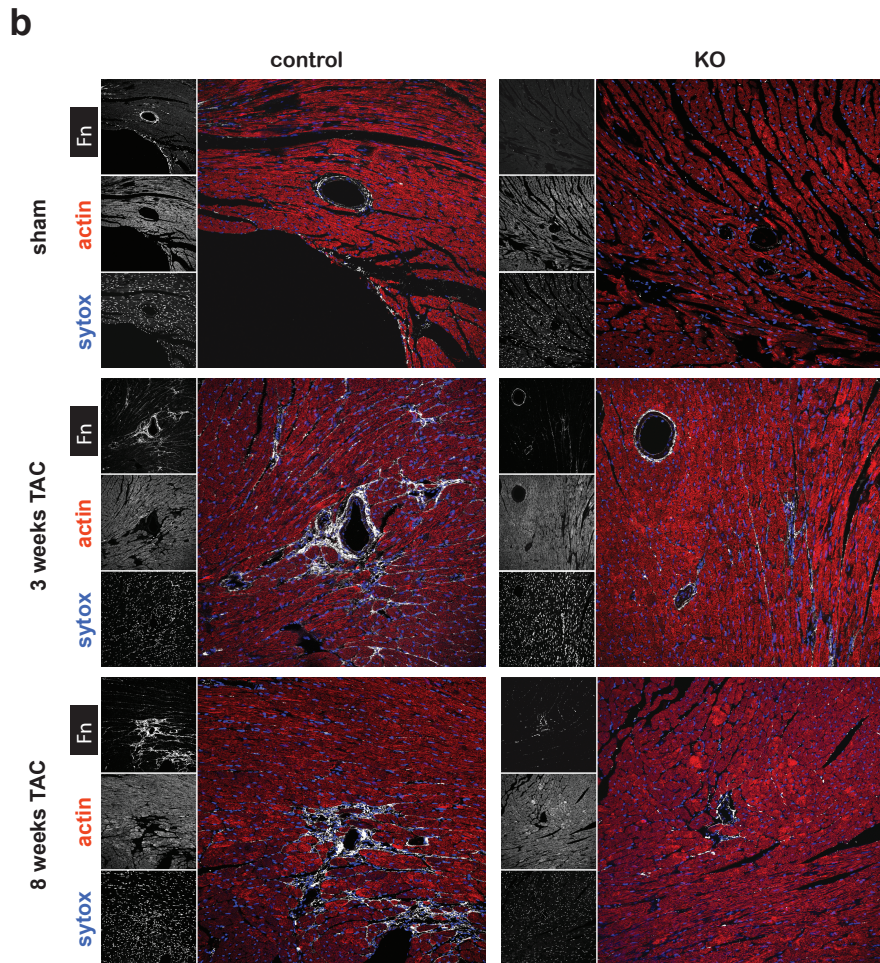

Suppl. Figure 2

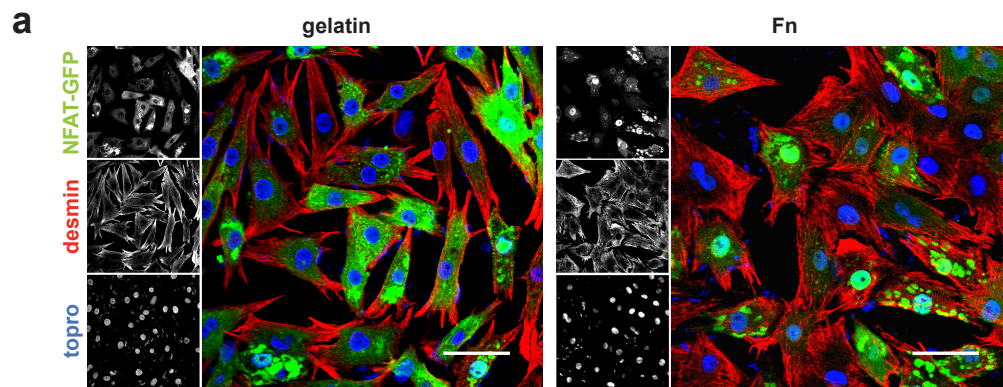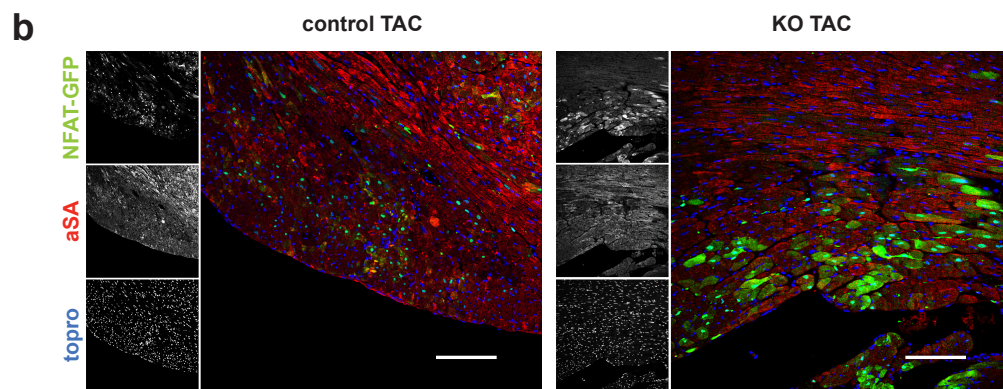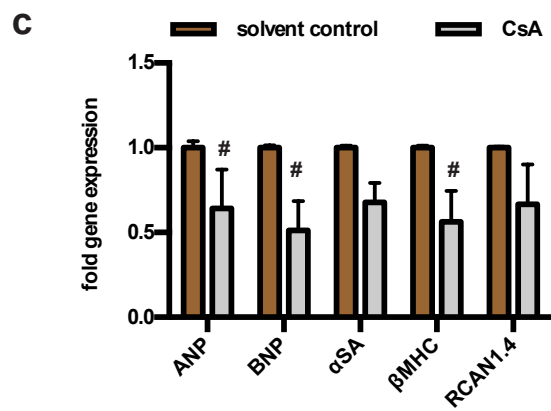

Suppl. Figure 3

Supplement: NIHMS512556-supplement-395_2013_375_MOESM1_ESM.pdf [file NIHMS512556-supplement-395_2013_375_MOESM1_ESM.pdf]
